# Supplementary material
Source: PubMed Central journal article supplement (PMC5819427)
Supplement: pnas.1716669115.sapp.pdf [file pnas.1716669115.sapp.pdf]

**Supplementary Figure 1.** The strategy used for the quantitative PCR is shown.  $V\alpha 14$  rearrangements were amplified with primers specific for  $V\alpha 14$  ( $V\alpha 14F$ ) and  $C\alpha$  ( $C\alpha R$ ) and a  $V\alpha 14$ -specific probe ( $V\alpha 14Probe$ ). Determination of  $J\alpha 18$ -usage within  $V\alpha 14$  rearrangement was revealed using an identical amplification strategy ( $V\alpha 14F-C\alpha R$ ) and a  $J\alpha 18$ -specific probe ( $J\alpha 18 Probe$ ). In parallel, total amount of TCR rearrangements in each sample was determined by amplifying the TCR $\alpha$  constant region using specific primers and probe ( $C\alpha F$ ,  $C\alpha R$  and  $C\alpha Probe$ ). The relative amount of  $V\alpha 14$  rearrangement was normalized to the amount of TCR $\alpha$  rearrangement in each sample. The relative  $J\alpha 18$  usage within  $V\alpha 14$  rearrangement was normalized to the total amount of  $V\alpha 14$  rearrangement in each sample.

**Supplementary Figure 2.** Left panel, unbiased Fo-Fc electron density map (in magenta) contoured at  $2.2\sigma$  level of the unknown endogenous bound lipid(s). Right panel, 2Fo-Fc electron density map (in marine) contoured at  $0.8\sigma$  level of the phosphatidic acid (C10) lipid Ag modeled in the unbiased electron density (Left panel). The lipid Ag is shown as black sticks. For clarity, only the  $\alpha 1$ - and  $\alpha 2$ - helices of CD1d2 are colored in light grey and shown as cartoon representation.

**Supplementary Figure 3.** Sequence alignment of *CD1D2* and *CD1D1*. The residues on a red background are strictly conserved whilst residues in red font and framed in blue are similar across both sequences. The secondary structural elements of CD1d2 are indicated atop the alignment and the numbering is based on the coordinates of the CD1d2 crystal structure. The alignment was computed using Clustal Omega (63) and edited by ESPript 3.0 (64).

**Supplementary Figure 4.** (A) Molecular surface of CD1d2 (in grey) and position of the non-conserved residues in CD1d1 (In magenta). (B) Molecular surface of the antigen-binding cleft of CD1d2 and footprint of the residues that form the cleft and that are not conserved in CD1d1 (in red).

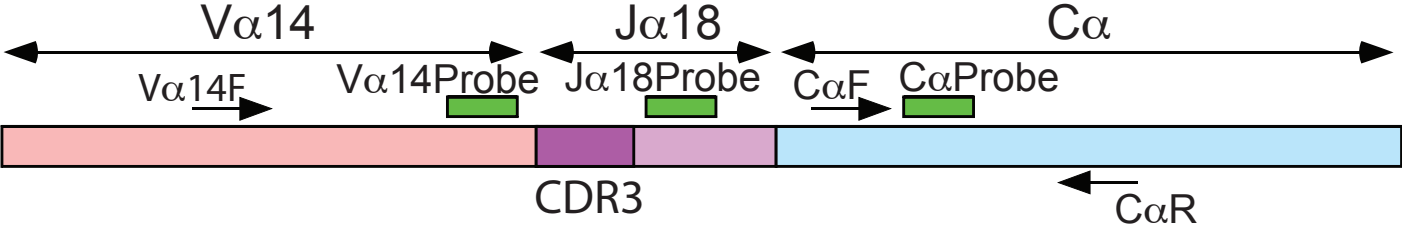

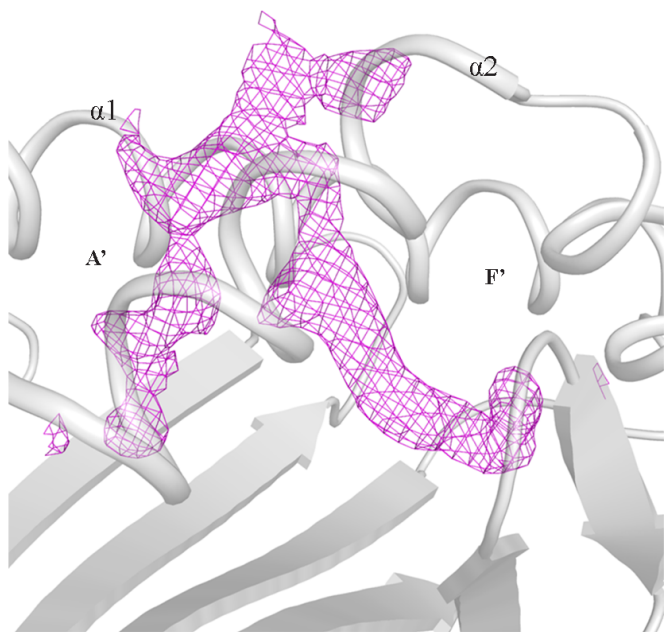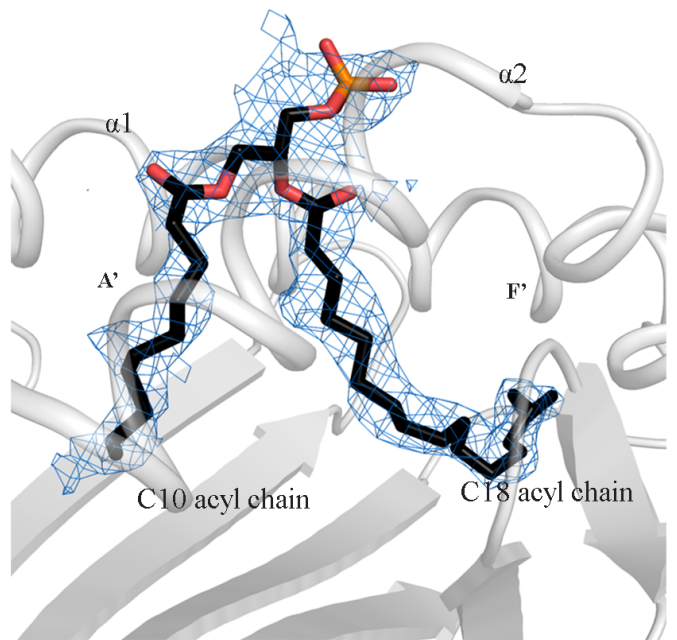

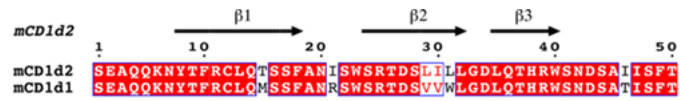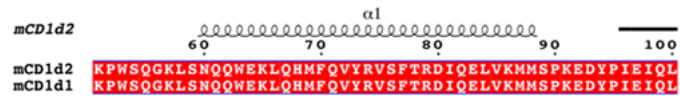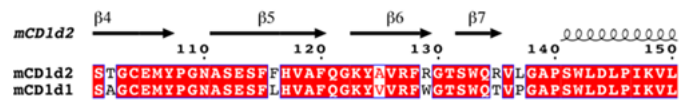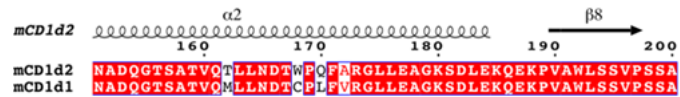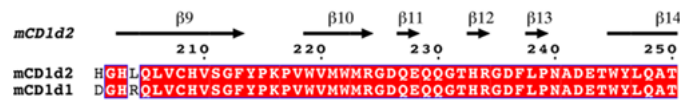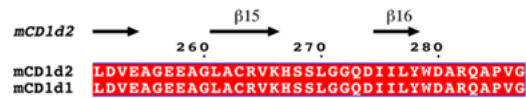

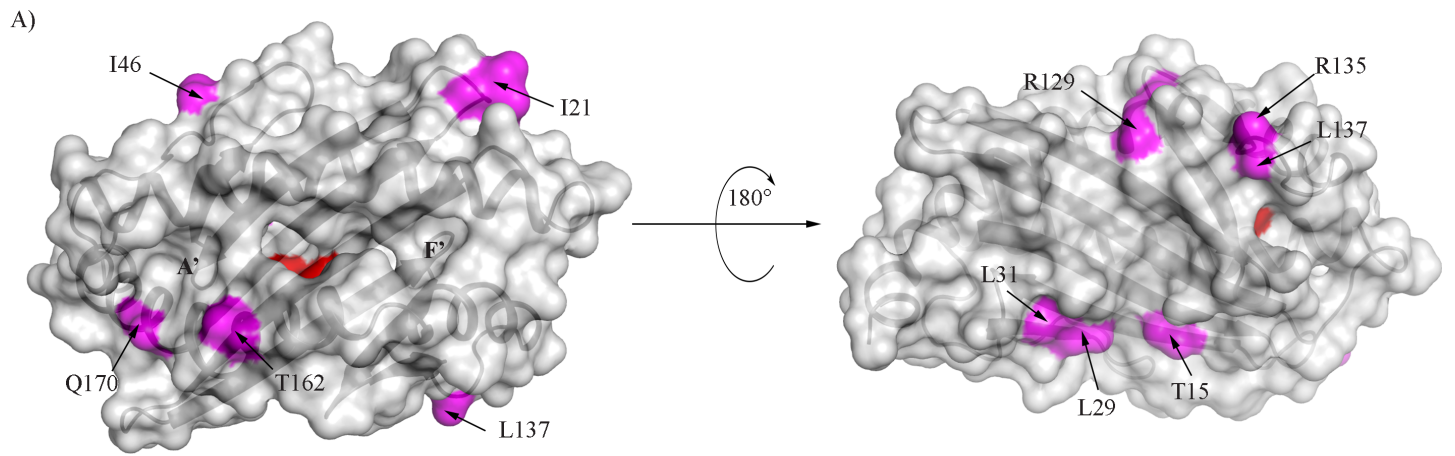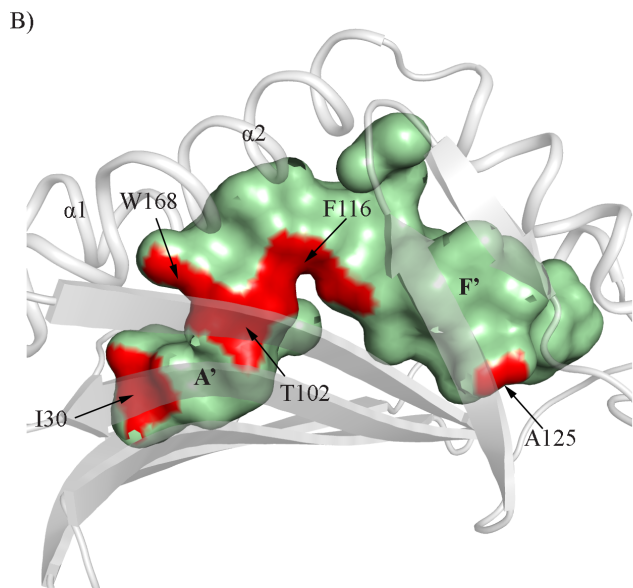

## Supplementary table 1

### Data collection and refinement statistics

|                                      | CD1d2-endogenous lipids                       | CD1d2- $\alpha$ -GalCer (C10)                          |
|--------------------------------------|-----------------------------------------------|--------------------------------------------------------|
| <b>Data collection</b>               |                                               |                                                        |
| Temperature                          | 100K                                          | 100K                                                   |
| Resolution limits (Å)                | 46.19-2.43 (2.56-2.43)                        | 45.93 -2.3 (2.38-2.30)                                 |
| Space Group                          | $P2_1$                                        | $P2_1$                                                 |
| Cell dimensions (Å)                  | $a=58.57, b=71.55, c=104.75$<br>$\beta=101.8$ | $a=105.96, b=74.23,$<br>$c=117.60, \beta=102.94^\circ$ |
| Total N <sup>o</sup> observations    | 239689 (34156)                                | 556347 (30235)                                         |
| N <sup>o</sup> unique observations   | 32094 (4600)                                  | 79496 (7814)                                           |
| Multiplicity                         | 7.5 (7.4)                                     | 7.0 (6.9)                                              |
| Data completeness                    | 99.7 (98.4)                                   | 99.8 (97.5)                                            |
| Wilson B-factors (Å <sup>2</sup> )   | 50.3                                          | 36.19                                                  |
| I/ $\sigma_I$                        | 17.9 (2.9)                                    | 11.6 (2.8)                                             |
| R <sub>p.i.m</sub> <sup>1</sup> (%)  | 4.4 (31.2)                                    | 4.3 (34.8)                                             |
| <b>Refinement statistics</b>         |                                               |                                                        |
| R <sub>factor</sub> <sup>2</sup> (%) | 21.5                                          | 23                                                     |
| R <sub>free</sub> <sup>3</sup> (%)   | 25.1                                          | 28                                                     |
| Non hydrogen atoms                   |                                               |                                                        |
| - Protein                            | 5836                                          | 11728                                                  |
| - Water                              | 64                                            | 305                                                    |
| - Heterogen                          | 84                                            | 363                                                    |
| Ramachandran plot (%)                |                                               |                                                        |
| - Most favoured                      | 97.6                                          | 98                                                     |
| - Allowed                            | 2.4                                           | 2                                                      |
| r.m.s.d bonds (Å)                    | 0.01                                          | 0.005                                                  |
| r.m.s.d angles (°)                   | 1.11                                          | 0.83                                                   |

$$^1 R_{p.i.m} = \sum_{hkl} [1/(N-1)]^{1/2} \sum_i |I_{hkl,i} - \langle I_{hkl} \rangle| / \sum_{hkl} \langle I_{hkl} \rangle$$

$$^2 R_{factor} = (\sum ||F_o| - |F_c||) / (\sum |F_o|) - \text{for all data except as indicated in footnote 3.}$$

<sup>3</sup> 5% of data was used for the R<sub>free</sub> calculation

Values in parentheses refer to the highest resolution bin
